# Supplementary material
Source: publisher site journal article supplement (https://www.dovepress.com/article/477265)
Supplement: Supplementary file 1 [file get_supplementary_file.php]

**Supplementary Materials**

**Table S1. Intraoperative and pathological characteristics of HCC patients receiving liver resection before generalized propensity score analysis**

|  | **OLR (n=1237)** | **LLR (n=307)** | ***P* value** |
| --- | --- | --- | --- |
| **Type of hepatectomy** |  |  | <0.001 |
| Anatomical | 579 (46.8) | 157 (51.1) |  |
| Non-anatomical | 658 (53.2) | 150 (48.9) |  |
| **Operative time (hour)** | 3.20 (2.58, 4.07) | 4.25 (3.04, 5.79) | <0.001 |
| **Blood loss (mL)** | 200 (100, 400) | 200 (100, 400) | 0.001 |
| **Blood loss ≥ 200 mL (%)** | 796 (67.7) | 160 (54.6) | <0.001 |
| **Intraoperative blood transfusion (%)** |  |  | 0.246 |
| No | 632 (51.1) | 152 (49.5) |  |
| Yes | 605 (48.9) | 155 (50.5) |  |
| **Microvascular invasion** | 456 (42.5) | 65 (31.1) | <0.001 |
| **Satellites** | 118 (11.0) | 23 (11.0) | 0.396 |

Notes: HCC, hepatocellular carcinoma; OLR, open liver resection; LLR, laparoscopic liver resection.

**Table S2. Univariable and multivariable Cox proportional hazards modeling for RFS and OS in BCLC stage 0 HCC patients before and after generalized propensity score analysis**

|  | **Crude analysis** | | | | |  | **Overlap weighting analysis** | | | | |
| --- | --- | --- | --- | --- | --- | --- | --- | --- | --- | --- | --- |
|  | **Univariable analysis** | |  | **Multivariable analysis** | |  | **Univariable analysis** | |  | **Multivariable analysis** | |
|  | **HR (95% CI)** | ***P* value** |  | **HR (95% CI)** | ***P* value** |  | **HR (95% CI)** | ***P* value** |  | **HR (95% CI)** | ***P* value** |
| **RFS** |  |  |  |  |  |  |  |  |  |  |  |
| LLR vs OLR | 0.42 (0.17, 1.05) | 0.063 |  | 0.43 (0.17, 1.07) | 0.070 |  | 0.55 (0.21, 1.41) | 0.212 |  | 0.54 (0.21, 1.41) | 0.212 |
| PA vs OLR | 0.87 (0.50, 1.52) | 0.622 |  | 0.89 (0.49, 1.62) | 0.704 |  | 0.99 (0.54, 1.85) | 0.986 |  | 1.00 (0.54, 1.84) | 0.996 |
| PA vs LLR | 2.06 (0.86, 4.95) | 0.106 |  | 2.09 (0.82, 5.31) | 0.123 |  | 1.81 (0.74, 4.45) | 0.193 |  | 1.84 (0.76, 4.46) | 0.179 |
| **OS** |  |  |  |  |  |  |  |  |  |  |  |
| LLR vs OLR | 0.22 (0.03, 1.75) | 0.152 |  | 0.16 (0.02, 1.35) | 0.092 |  | 0.21 (0.03, 1.75) | 0.15 |  | 0.20 (0.02, 1.80) | 0.152 |
| PA vs OLR | 0.49 (0.17, 1.40) | 0.181 |  | 0.36 (0.11, 1.15) | 0.086 |  | 0.34 (0.10, 1.09) | 0.068 |  | 0.28 (0.07, 1.09) | 0.067 |
| PA vs LLR | 2.22 (0.27, 18.48) | 0.460 |  | 2.27 (0.25, 20.82) | 0.469 |  | 1.58 (0.18, 14.18) | 0.680 |  | 1.39 (0.14, 13.91) | 0.781 |

Notes: HCC, hepatocellular carcinoma; OLR, open liver resection; LLR, laparoscopic liver resection; PA, percutaneous ablation; RFS, recurrence-free survival; OS, overall survival.

**Table S3. Univariable and multivariable Cox proportional hazards modeling for RFS and OS in BCLC stage A HCC patients before and after generalized propensity score analysis**

|  | **Crude analysis** | | | | |  | **Overlap weighting analysis** | | | | |
| --- | --- | --- | --- | --- | --- | --- | --- | --- | --- | --- | --- |
|  | **Univariable analysis** | |  | **Multivariable analysis** | |  | **Univariable analysis** | |  | **Multivariable analysis** | |
|  | **HR (95% CI)** | ***P* value** |  | **HR (95% CI)** | ***P* value** |  | **HR (95% CI)** | ***P* value** |  | **HR (95% CI)** | ***P* value** |
| **RFS** |  |  |  |  |  |  |  |  |  |  |  |
| LLR vs OLR | 0.69 (0.55, 0.85) | 0.001 |  | 0.72 (0.58, 0.89) | 0.003 |  | 0.78 (0.59, 1.04) | 0.095 |  | 0.74 (0.55, 1.00) | 0.047 |
| PA vs OLR | 1.10 (0.87, 1.37) | 0.430 |  | 1.13 (0.90, 1.42) | 0.286 |  | 1.40 (1.09, 1.81) | 0.009 |  | 1.37 (1.06, 1.79) | 0.017 |
| PA vs LLR | 1.60 (1.19, 2.13) | 0.002 |  | 1.71 (1.26, 2.32) | 0.001 |  | 1.79 (1.29, 2.49) | 0.001 |  | 1.85 (1.32, 2.60) | <0.001 |
| **OS** |  |  |  |  |  |  |  |  |  |  |  |
| LLR vs OLR | 0.51 (0.35, 0.76) | 0.001 |  | 0.65 (0.43, 0.96) | 0.031 |  | 0.58 (0.33, 1.02) | 0.059 |  | 0.56 (0.32, 0.99) | 0.045 |
| PA vs OLR | 0.58 (0.37, 0.90) | 0.016 |  | 0.79 (0.48, 1.28) | 0.337 |  | 0.74 (0.44, 1.23) | 0.243 |  | 0.76 (0.46, 1.28) | 0.302 |
| PA vs LLR | 1.13 (0.64, 1.99) | 0.674 |  | 1.22 (0.68, 2.20) | 0.505 |  | 1.27 (0.63, 2.58) | 0.503 |  | 1.36 (0.67, 2.75) | 0.399 |

Notes: HCC, hepatocellular carcinoma; OLR, open liver resection; LLR, laparoscopic liver resection; PA, percutaneous ablation; RFS, recurrence-free survival; OS, overall survival.

**Figure S1. Assessment of balance of other generalized propensity analysis methods. (A-F)** The absolute SMDs of potential confounders before and after Three-way matching **(A)**, TriMatch **(B)**, TriMatch with exact matching **(C)**, inverse probability weighting **(D)**, matching weights **(E)** and IPW with trimming **(F)**. ALT, alanine aminotransferase; AST, aspartate aminotransferase; AFP, alpha-fetoprotein; SMD, standardized mean difference; PSA, propensity score analysis; IPW, inverse probability weighting.

**Figure S2. Kaplan-Meier curves for long-term outcomes of BCLC stage 0-A HCC patients who underwent OLR, LLR and PA after other generalized propensity score analysis methods. (A-F)** Overall survival after Three-way matching **(A)**, TriMatch **(B)**, TriMatch with exact matching **(C)**, inverse probability weighting **(D)**, matching weights **(E)** and IPW with trimming **(F)**. **(G-L)** Recurrence-free survival after Three-way matching **(G)**, TriMatch **(H)**, TriMatch with exact matching **(I)**, inverse probability weighting **(J)**, matching weights **(K)** and IPW with trimming **(L)**. IPW, inverse probability weighting.

**Figure S3. The hazard difference of all-cause mortality and recurrence among three treatment comparisons after overlap weighting analysis. (A)** Overall survival, **(B)** Recurrence-free survival. OLR, open liver resection; LLR, laparoscopic liver resection; PA, percutaneous ablation.

**Figure S4. Kaplan-Meier curves for long-term outcomes of BCLC stage 0 or A HCC patients who underwent OLR, LLR and PA after overlap weighting analysis. (A-B)** Overall survival **(A)** and recurrence-free survival **(B)** for BCLC stage 0 HCC patients. **(C-D)** Overall survival **(C)** and recurrence-free survival **(D)** for BCLC stage A HCC patients. HCC, hepatocellular carcinoma; OLR, open liver resection; LLR, laparoscopic liver resection; PA, percutaneous ablation.
